# Supplementary material
Source: PubMed Central journal article supplement (PMC6756201)
Supplement: 41380_2018_260_MOESM2_ESM.pdf [file 41380_2018_260_MOESM2_ESM.pdf]

| Gene               | Mean Reads | Reads Ctrol | Reads KO   | Fold Change | log2 FC     | Reads (Ctrol-KO) | P value    |
|--------------------|------------|-------------|------------|-------------|-------------|------------------|------------|
| <i>Stmn1-rs1</i>   | 507,58017  | 1014,48417  | 0,67617263 | 0,00066652  | -10,5510671 | 1013,807995      | 4,3363E-42 |
| <i>Slc6a4</i>      | 943,844123 | 1779,77653  | 107,911714 | 0,06063217  | -4,04377272 | 1671,864818      | 3,4404E-17 |
| <i>Pcdhga9</i>     | 7,67415607 | 14,0178049  | 1,33050722 | 0,09491552  | -3,3972122  | 12,68729769      | 0,00727627 |
| <i>Rims4</i>       | 16,1159609 | 26,4804101  | 5,75151172 | 0,21719874  | -2,20291236 | 20,72889836      | 0,00686227 |
| <i>Fcrls</i>       | 59,099385  | 94,8568999  | 23,3418702 | 0,24607456  | -2,02283256 | 71,51502965      | 0,00024234 |
| <i>Pold1</i>       | 40,9196398 | 65,3574901  | 16,4817895 | 0,25217905  | -1,98747969 | 48,87570059      | 0,00077209 |
| <i>Pcdhgb6</i>     | 25,0621162 | 39,085147   | 11,0390854 | 0,28243684  | -1,82399981 | 28,04606154      | 0,00707109 |
| <i>Pcdhga7</i>     | 37,9747573 | 59,113732   | 16,8357827 | 0,28480324  | -1,81196251 | 42,27794935      | 0,00324623 |
| <i>Laptm5</i>      | 60,5714076 | 93,7960515  | 27,3467638 | 0,29155556  | -1,77815708 | 66,44928776      | 0,00093988 |
| <i>Ccne1</i>       | 59,798783  | 91,4808059  | 28,11676   | 0,30735147  | -1,70203872 | 63,36404596      | 0,0029225  |
| <i>Pcdhb8</i>      | 47,9991728 | 73,0815376  | 22,9168079 | 0,31357862  | -1,67310088 | 50,16472967      | 0,00483444 |
| <i>Slit3</i>       | 23,5746476 | 35,645517   | 11,5037782 | 0,32272721  | -1,63161288 | 24,14173881      | 0,01855693 |
| <i>Pcdhgc4</i>     | 165,329652 | 249,595745  | 81,0635591 | 0,32477941  | -1,62246792 | 168,5321862      | 0,00027026 |
| <i>Flywch1</i>     | 307,388929 | 463,57567   | 151,202187 | 0,32616506  | -1,61632584 | 312,3734826      | 0,00013469 |
| <i>Gna12</i>       | 289,853981 | 434,857648  | 144,850314 | 0,33309823  | -1,5859804  | 290,0073344      | 0,0002024  |
| <i>Lama2</i>       | 51,8626249 | 76,953773   | 26,7714768 | 0,34789037  | -1,52329534 | 50,18229622      | 0,01131334 |
| <i>Pcdha10</i>     | 42,1369322 | 62,3550312  | 21,9188332 | 0,35151667  | -1,50833497 | 40,43619807      | 0,01023787 |
| <i>2210408F21f</i> | 53,8647869 | 79,102666   | 28,6269078 | 0,36189561  | -1,46635448 | 50,47575822      | 0,01945091 |
| <i>Telo2</i>       | 202,169455 | 293,194842  | 111,144068 | 0,37907921  | -1,39942877 | 182,0507736      | 0,00144999 |
| <i>Gpam</i>        | 61,9550633 | 89,6994547  | 34,2106719 | 0,38139219  | -1,39065278 | 55,48878281      | 0,0084675  |
| <i>Pcdha12</i>     | 91,4743701 | 132,422573  | 50,5261671 | 0,38155252  | -1,39004642 | 81,89640596      | 0,00345213 |
| <i>Snx8</i>        | 50,0715918 | 72,3247729  | 27,8184108 | 0,38463184  | -1,37844989 | 44,50636218      | 0,01158036 |
| <i>Myo7a</i>       | 50,8599768 | 73,4322631  | 28,2876906 | 0,38522155  | -1,37623966 | 45,14457254      | 0,01983551 |
| <i>Clstn1</i>      | 917,830447 | 1322,18675  | 513,474141 | 0,38835221  | -1,36456244 | 808,7126115      | 0,00061303 |
| <i>Pla2g6</i>      | 103,806564 | 149,405178  | 58,2079501 | 0,38959794  | -1,35994204 | 91,1972283       | 0,00418726 |
| <i>Qsox1</i>       | 108,151316 | 155,658247  | 60,6443847 | 0,38959956  | -1,35993604 | 95,01386195      | 0,00409302 |
| <i>Ano8</i>        | 67,6501738 | 97,1691715  | 38,131176  | 0,39242051  | -1,34952764 | 59,03799549      | 0,00649498 |
| <i>Plcg1</i>       | 115,618927 | 165,949018  | 65,288837  | 0,39342708  | -1,34583184 | 100,6601807      | 0,00350157 |
| <i>Fam171a2</i>    | 76,1606275 | 109,039735  | 43,2815196 | 0,39693346  | -1,33303091 | 65,75821579      | 0,00556217 |
| <i>Gm1821</i>      | 19933,9907 | 28443,8883  | 11424,093  | 0,40163612  | -1,31603906 | 17019,79526      | 0,00269114 |
| <i>Zfp768</i>      | 48,1875451 | 68,7250738  | 27,6500163 | 0,40232792  | -1,31355622 | 41,07505751      | 0,01466565 |
| <i>Ppp1r37</i>     | 101,352641 | 144,459317  | 58,2459657 | 0,40319979  | -1,31043322 | 86,21335144      | 0,00465868 |
| <i>Pcdha3</i>      | 90,6896306 | 129,034655  | 52,3446067 | 0,40566317  | -1,30164578 | 76,69004781      | 0,00774867 |

|                    |            |            |            |            |             |             |            |
|--------------------|------------|------------|------------|------------|-------------|-------------|------------|
| <b>Pcdha2</b>      | 75,0362642 | 106,5097   | 43,5628287 | 0,40900339 | -1,28981528 | 62,94687098 | 0,01065707 |
| <b>Heatr2</b>      | 68,9585575 | 96,9703847 | 40,9467302 | 0,42226016 | -1,24379596 | 56,02365441 | 0,01399259 |
| <b>Pcdha11</b>     | 82,3524129 | 115,651679 | 49,0531466 | 0,42414556 | -1,23736862 | 66,59853252 | 0,0088682  |
| <b>Aldh3a1</b>     | 857,039188 | 1202,96549 | 511,112882 | 0,42487743 | -1,2348814  | 691,8526111 | 0,00523316 |
| <b>Aaed1</b>       | 41,6624565 | 58,4435919 | 24,8813212 | 0,42573224 | -1,23198175 | 33,56227069 | 0,04884464 |
| <b>Stk32c</b>      | 123,16918  | 172,589111 | 73,7492489 | 0,42731114 | -1,22664118 | 98,83986161 | 0,00717973 |
| <b>Rhpn1</b>       | 33,7177331 | 47,2103542 | 20,2251119 | 0,42840416 | -1,22295562 | 26,98524223 | 0,03547139 |
| <b>Pcdha7</b>      | 54,8313922 | 76,7440135 | 32,9187709 | 0,42894252 | -1,22114375 | 43,82524262 | 0,02403679 |
| <b>Taf1c</b>       | 56,236087  | 78,4592328 | 34,0129413 | 0,43351101 | -1,20585946 | 44,4462915  | 0,0235997  |
| <b>Pex10</b>       | 93,5344928 | 129,920209 | 57,1487764 | 0,43987596 | -1,18483135 | 72,7714328  | 0,01616354 |
| <b>Pnpla3</b>      | 185,842069 | 257,490004 | 114,194133 | 0,44348958 | -1,17302789 | 143,2958704 | 0,0137546  |
| <b>4931428F04f</b> | 300,871261 | 414,965024 | 186,777498 | 0,4501042  | -1,15166908 | 228,1875254 | 0,00493865 |
| <b>Lss</b>         | 269,180257 | 370,429203 | 167,931311 | 0,45334253 | -1,14132659 | 202,4978923 | 0,00722415 |
| <b>Jun</b>         | 103,517579 | 142,117351 | 64,9178061 | 0,45679015 | -1,13039655 | 77,19954474 | 0,01363008 |
| <b>Mapk15</b>      | 47,0258469 | 64,4838593 | 29,5678346 | 0,45853078 | -1,1249095  | 34,91602469 | 0,04508129 |
| <b>Samd5</b>       | 49,6130848 | 67,9792818 | 31,2468877 | 0,4596531  | -1,12138262 | 36,73239413 | 0,04797393 |
| <b>Xkr4</b>        | 218,218374 | 298,688844 | 137,747905 | 0,46117526 | -1,11661297 | 160,9409385 | 0,0102209  |
| <b>Cpne7</b>       | 48,5302911 | 66,4194474 | 30,6411349 | 0,46132776 | -1,11613598 | 35,77831244 | 0,04712262 |
| <b>Xylt1</b>       | 46,5980112 | 63,6479259 | 29,5480966 | 0,46424288 | -1,1070483  | 34,09982923 | 0,03989366 |
| <b>Mlc1</b>        | 57,1386324 | 77,8718368 | 36,4054279 | 0,46750442 | -1,09694809 | 41,46640894 | 0,03969767 |
| <b>Polr3g</b>      | 71,1964927 | 96,9598445 | 45,433141  | 0,46857688 | -1,09364234 | 51,52670349 | 0,04796489 |
| <b>Tmem150c</b>    | 178,781925 | 243,360664 | 114,203185 | 0,46927545 | -1,0914931  | 129,1574787 | 0,01069152 |
| <b>Fads2</b>       | 438,505031 | 596,339197 | 280,670866 | 0,47065641 | -1,08725385 | 315,6683307 | 0,00800253 |
| <b>Slc20a2</b>     | 170,463913 | 231,681993 | 109,245833 | 0,47153355 | -1,08456767 | 122,43616   | 0,01546913 |
| <b>Pcdha5</b>      | 91,5069663 | 124,044935 | 58,9689974 | 0,47538416 | -1,07283426 | 65,07593767 | 0,02620703 |
| <b>1500009C09f</b> | 619,375263 | 837,581432 | 401,169095 | 0,4789613  | -1,06201899 | 436,4123373 | 0,01708532 |
| <b>Limk1</b>       | 158,612868 | 214,109733 | 103,116003 | 0,48160353 | -1,05408213 | 110,99373   | 0,01280883 |
| <b>Ggt7</b>        | 968,094754 | 1305,23032 | 630,959191 | 0,48340832 | -1,0486858  | 674,2711263 | 0,00804082 |
| <b>Ralgps1</b>     | 71,5649082 | 96,4422486 | 46,6875679 | 0,48409871 | -1,04662685 | 49,7546807  | 0,03378437 |
| <b>Cdh18</b>       | 388,064525 | 522,76143  | 253,367621 | 0,48467161 | -1,04492053 | 269,3938084 | 0,01679024 |
| <b>Sh3bp5f</b>     | 396,154433 | 532,815476 | 259,493391 | 0,487023   | -1,03793819 | 273,3220844 | 0,01156963 |
| <b>Clstn3</b>      | 748,351112 | 1003,21805 | 493,484175 | 0,49190121 | -1,02355948 | 509,7338723 | 0,00988872 |
| <b>Unk</b>         | 126,851571 | 169,54208  | 84,1610622 | 0,4964022  | -1,01041858 | 85,38101827 | 0,0228839  |
| <b>Lrrc47</b>      | 79,7694656 | 106,519931 | 53,0190003 | 0,49773784 | -1,00654202 | 53,50093057 | 0,03736322 |

|                   |            |            |            |            |             |             |            |
|-------------------|------------|------------|------------|------------|-------------|-------------|------------|
| <b>Cbs</b>        | 117,078509 | 155,893105 | 78,2639129 | 0,50203576 | -0,99413798 | 77,62919223 | 0,04354626 |
| <b>Aldh2</b>      | 180,326137 | 240,055965 | 120,596309 | 0,50236747 | -0,99318503 | 119,4596563 | 0,0181119  |
| <b>BC005764</b>   | 951,340931 | 1266,3502  | 636,331667 | 0,50249265 | -0,9928256  | 630,0185287 | 0,00886561 |
| <b>Lzts2</b>      | 65,5815679 | 87,1130215 | 44,0501142 | 0,50566624 | -0,98374263 | 43,06290735 | 0,04353275 |
| <b>Wwc1</b>       | 162,388992 | 215,531725 | 109,24626  | 0,50686858 | -0,98031635 | 106,2854648 | 0,02599855 |
| <b>Synpr</b>      | 138,930669 | 183,5188   | 94,3425369 | 0,5140756  | -0,95994757 | 89,17626347 | 0,04830051 |
| <b>Med25</b>      | 531,61235  | 701,940473 | 361,284227 | 0,51469354 | -0,95821442 | 340,6562468 | 0,01377957 |
| <b>Pfkl</b>       | 873,500568 | 1151,28272 | 595,718414 | 0,51743886 | -0,9505397  | 555,5643084 | 0,01631295 |
| <b>Ttll11</b>     | 83,3593364 | 109,72697  | 56,9917029 | 0,51939558 | -0,94509436 | 52,73526699 | 0,04741467 |
| <b>Tle2</b>       | 121,939159 | 160,362097 | 83,5162204 | 0,52079776 | -0,94120486 | 76,84587659 | 0,02832199 |
| <b>Chst15</b>     | 134,503075 | 176,784504 | 92,2216461 | 0,52166137 | -0,9388145  | 84,56285823 | 0,03959508 |
| <b>St3gal3</b>    | 147,669922 | 194,036834 | 101,303011 | 0,52208134 | -0,93765349 | 92,7338231  | 0,02918148 |
| <b>Cadm4</b>      | 516,068803 | 678,065958 | 354,071648 | 0,52217877 | -0,93738429 | 323,9943102 | 0,01650919 |
| <b>St6galnac6</b> | 423,444424 | 556,19661  | 290,692239 | 0,52264295 | -0,9361024  | 265,5043715 | 0,01936418 |
| <b>Wdr6</b>       | 1790,85357 | 2348,58043 | 1233,1267  | 0,52505194 | -0,92946796 | 1115,453729 | 0,01692312 |
| <b>Pcdhga11</b>   | 102,092921 | 133,841938 | 70,3439038 | 0,52557445 | -0,92803294 | 63,49803455 | 0,04861483 |
| <b>Swsap1</b>     | 158,869419 | 207,966467 | 109,772372 | 0,52783688 | -0,92183593 | 98,19409479 | 0,04435179 |
| <b>Gpr27</b>      | 260,061636 | 339,916411 | 180,206862 | 0,53015052 | -0,91552607 | 159,7095485 | 0,0234788  |
| <b>Sema6b</b>     | 176,639034 | 230,552951 | 122,725117 | 0,53230773 | -0,90966759 | 107,8278338 | 0,02817257 |
| <b>Mafk</b>       | 98,8645271 | 128,983972 | 68,745082  | 0,53297383 | -0,90786339 | 60,23889029 | 0,0439298  |
| <b>Ppp2r5d</b>    | 849,690354 | 1108,31851 | 591,062202 | 0,53329634 | -0,90699067 | 517,2563028 | 0,01933426 |
| <b>Dgkh</b>       | 197,078049 | 256,913484 | 137,242614 | 0,53419779 | -0,9045541  | 119,6708698 | 0,03730719 |
| <b>Pkn1</b>       | 184,036387 | 239,723179 | 128,349595 | 0,53540753 | -0,90129067 | 111,373584  | 0,03122319 |
| <b>Zbtb17</b>     | 191,170286 | 248,608231 | 133,73234  | 0,53792402 | -0,89452567 | 114,8758912 | 0,03676392 |
| <b>Mib2</b>       | 260,967361 | 339,025387 | 182,909335 | 0,53951516 | -0,8902646  | 156,1160519 | 0,02981248 |
| <b>Agap3</b>      | 1767,36362 | 2288,08264 | 1246,64461 | 0,54484248 | -0,87608891 | 1041,438027 | 0,01986145 |
| <b>Aldh1b1</b>    | 590,482529 | 763,722154 | 417,242904 | 0,54632814 | -0,87216036 | 346,4792503 | 0,02616353 |
| <b>Fam109a</b>    | 169,505474 | 218,852539 | 120,158409 | 0,54903822 | -0,8650215  | 98,69412949 | 0,03373375 |
| <b>Zgpat</b>      | 251,783198 | 324,287897 | 179,278499 | 0,55283746 | -0,85507271 | 145,0093986 | 0,04202595 |
| <b>D10Jhu81e</b>  | 260,58025  | 335,597106 | 185,563393 | 0,55293502 | -0,85481814 | 150,0337132 | 0,03996914 |
| <b>Psap</b>       | 4276,33351 | 5501,6607  | 3051,00632 | 0,55456097 | -0,850582   | 2450,65438  | 0,0250997  |
| <b>Scyl1</b>      | 555,488247 | 714,635352 | 396,341142 | 0,55460612 | -0,85046455 | 318,2942101 | 0,02791868 |
| <b>Akt1</b>       | 2108,31954 | 2709,11903 | 1507,52005 | 0,55646136 | -0,8456466  | 1201,598984 | 0,02325585 |
| <b>Map3k12</b>    | 441,789441 | 566,45838  | 317,120502 | 0,55983019 | -0,83693881 | 249,3378782 | 0,0352414  |

|                    |            |            |            |            |             |              |            |
|--------------------|------------|------------|------------|------------|-------------|--------------|------------|
| <b>Dpp3</b>        | 1233,51937 | 1580,72034 | 886,318395 | 0,56070538 | -0,83468519 | 694,4019494  | 0,03520026 |
| <b>Lrrc45</b>      | 193,792725 | 248,006324 | 139,579126 | 0,5628047  | -0,82929371 | 108,4271983  | 0,04086624 |
| <b>Csnk1g2</b>     | 739,879212 | 945,057106 | 534,701318 | 0,56578731 | -0,82166828 | 410,3557886  | 0,03282648 |
| <b>Podxl2</b>      | 1542,08835 | 1967,42778 | 1116,74891 | 0,56761876 | -0,81700583 | 850,6788729  | 0,02904845 |
| <b>Ap2a1</b>       | 982,932621 | 1252,12478 | 713,740466 | 0,57002343 | -0,81090686 | 538,3843111  | 0,0351193  |
| <b>Atp9a</b>       | 5152,81284 | 6547,63978 | 3757,9859  | 0,57394512 | -0,8010153  | 2789,653882  | 0,03572765 |
| <b>Aph1a</b>       | 367,452339 | 466,033033 | 268,871645 | 0,57693688 | -0,7935146  | 197,1613878  | 0,04697265 |
| <b>Thop1</b>       | 479,706787 | 607,813388 | 351,600187 | 0,57846733 | -0,78969262 | 256,2132016  | 0,04253399 |
| <b>Mmp17</b>       | 899,568925 | 1135,84792 | 663,289926 | 0,58396015 | -0,77605817 | 472,5579975  | 0,03949969 |
| <b>Spryd3</b>      | 1472,64822 | 1857,72542 | 1087,57103 | 0,58543153 | -0,77242766 | 770,1543939  | 0,04490443 |
| <b>Atf6b</b>       | 477,884724 | 599,788703 | 355,980745 | 0,59351025 | -0,75265514 | 243,8079584  | 0,04703071 |
| <b>Prrt2</b>       | 1245,62975 | 1558,1521  | 933,107403 | 0,59885514 | -0,73972102 | 625,0447013  | 0,04286362 |
| <b>Npy</b>         | 622,984744 | 440,761683 | 805,207806 | 1,82685528 | 0,86936235  | -364,4461238 | 0,03205418 |
| <b>Angpt1</b>      | 208,593358 | 146,806292 | 270,380424 | 1,84174956 | 0,8810769   | -123,5741315 | 0,04943649 |
| <b>Hnrnpa0</b>     | 1512,13719 | 1061,63295 | 1962,64143 | 1,84870056 | 0,88651157  | -901,0084791 | 0,03421167 |
| <b>Slc8a2</b>      | 132,597519 | 89,2665704 | 175,928467 | 1,9708214  | 0,97879704  | -86,66189643 | 0,04214033 |
| <b>Fosl2</b>       | 154,642566 | 103,423358 | 205,861775 | 1,99047662 | 0,99311392  | -102,4384172 | 0,04903831 |
| <b>Slc17a8</b>     | 547,595888 | 365,483833 | 729,707943 | 1,99655327 | 0,99751157  | -364,2241101 | 0,02402521 |
| <b>3110047P20I</b> | 133,306586 | 86,7577906 | 179,855381 | 2,07307471 | 1,05177211  | -93,09759069 | 0,03864048 |
| <b>Plp1</b>        | 170,657636 | 110,721942 | 230,593331 | 2,08263446 | 1,05840964  | -119,8713896 | 0,02848706 |
| <b>G530011006</b>  | 152,855287 | 98,6364866 | 207,074087 | 2,099366   | 1,06995371  | -108,4376    | 0,04320019 |
| <b>Antxr1</b>      | 78,6906126 | 50,4512664 | 106,929959 | 2,11947026 | 1,08370372  | -56,47869237 | 0,03723475 |
| <b>Map3k6</b>      | 103,073571 | 65,9905254 | 140,156616 | 2,12388998 | 1,08670904  | -74,16609059 | 0,0373415  |
| <b>Ubqln2</b>      | 1748,7269  | 1116,88134 | 2380,57246 | 2,13144617 | 1,09183262  | -1263,691121 | 0,01063588 |
| <b>2610507I01R</b> | 108,935812 | 69,5580049 | 148,313618 | 2,13222933 | 1,09236262  | -78,75561354 | 0,03403249 |
| <b>Nedd9</b>       | 92,61843   | 57,9783603 | 127,2585   | 2,19493099 | 1,13417558  | -69,28013942 | 0,02232248 |
| <b>Sncaip</b>      | 100,505851 | 61,8576385 | 139,154064 | 2,24958578 | 1,16965938  | -77,29642528 | 0,02311464 |
| <b>Rpia</b>        | 45,359313  | 27,5198342 | 63,1987919 | 2,29648157 | 1,1994252   | -35,67895773 | 0,04943376 |
| <b>Kdm5d</b>       | 86,4944391 | 52,1180992 | 120,870779 | 2,31917089 | 1,21360913  | -68,75267962 | 0,00731248 |
| <b>B230120H23I</b> | 45,0794598 | 26,8511509 | 63,3077688 | 2,35773018 | 1,23739862  | -36,45661792 | 0,03359127 |
| <b>Ddx3y</b>       | 941,500992 | 554,817496 | 1328,18449 | 2,39391241 | 1,25937036  | -773,3669908 | 0,00080068 |
| <b>Uty</b>         | 151,111228 | 86,4938668 | 215,72859  | 2,49414898 | 1,31854764  | -129,2347228 | 0,00174375 |
| <b>Pcdh20</b>      | 65,3737841 | 36,8715643 | 93,876004  | 2,54602716 | 1,34824781  | -57,00443976 | 0,01249246 |
| <b>Tuba1c</b>      | 219,309609 | 119,749532 | 318,869686 | 2,66280528 | 1,41294693  | -199,1201539 | 0,00253804 |

**Tbc1d1** 50,6405785 27,1302544 74,1509026 2,73314439 1,45056168 -47,02064817 0,01600824
