# Supplementary material
Source: PubMed Central journal article supplement (PMC6756201)
Supplement: 41380_2018_260_MOESM3_ESM.pdf [file 41380_2018_260_MOESM3_ESM.pdf]

Current Gene List: new\_converted\_list

Current Background: Mus musculus

120 DAVID IDs

### Options

241 chart records

Right-click and select 'Save Target As' to download results Download File

| Sublist | Category   | Term            | Count    | %    | P-Value | Fisher Exact | Fold Enrichment | log10 P-val |
|---------|------------|-----------------|----------|------|---------|--------------|-----------------|-------------|
|         | GOTERM_BP_ | regulation of c | 2,90E+01 | 24,2 | 0,00056 | 0,00029      | 1,9             | 3,537602    |
|         | GOTERM_BP_ | modulation o    | 8,00E+00 | 6,7  | 0,0015  | 0,00031      | 4,7             | 3,50863831  |
|         | GOTERM_BP_ | modulation o    | 8,00E+00 | 6,7  | 0,0015  | 0,00031      | 4,7             | 3,50863831  |
|         | GOTERM_BP_ | modulation o    | 8,00E+00 | 6,7  | 0,0018  | 0,00038      | 4,6             | 3,4202164   |
|         | GOTERM_BP_ | modulation o    | 8,00E+00 | 6,7  | 0,0018  | 0,00038      | 4,5             | 3,4202164   |
|         | GOTERM_BP_ | regulation of s | 2,80E+01 | 23,3 | 0,00091 | 0,00047      | 1,9             | 3,32790214  |
|         | GOTERM_BP_ | regulation of c | 2,90E+01 | 24,2 | 0,00092 | 0,00048      | 1,8             | 3,31875876  |
|         | GOTERM_BP_ | regulation of s | 28       | 23,3 | 0,00095 | 0,00049      | 1,9             | 3,30980392  |
|         | GOTERM_BP_ | regulation of c | 29       | 24,2 | 0,00096 | 0,00051      | 1,8             | 3,29242982  |
|         | GOTERM_BP_ | regulation of s | 28       | 23,3 | 0,001   | 0,00052      | 1,9             | 3,28399666  |
|         | GOTERM_CC_ | cell projectio  | 14       | 11,7 | 0,0021  | 0,00075      | 2,6             | 3,12493874  |
|         | GOTERM_CC_ | cell projectio  | 14       | 11,7 | 0,0021  | 0,00075      | 2,6             | 3,12493874  |
|         | GOTERM_CC_ | cell projectio  | 14       | 11,7 | 0,0022  | 0,0008       | 2,6             | 3,09691001  |
|         | GOTERM_MF_ | kinase binding  | 11       | 9,2  | 0,0032  | 0,001        | 3               | 3           |
|         | GOTERM_CC_ | membrane        | 70       | 58,3 | 0,0016  | 0,0012       | 1,3             | 2,92081875  |
|         | GOTERM_CC_ | membrane        | 70       | 58,3 | 0,0016  | 0,0012       | 1,3             | 2,92081875  |
|         | GOTERM_BP_ | regulation of s | 7        | 5,8  | 0,0063  | 0,0014       | 4,2             | 2,85387196  |
|         | GOTERM_MF_ | kinase binding  | 11       | 9,2  | 0,0043  | 0,0014       | 2,9             | 2,85387196  |
|         | GOTERM_CC_ | cell projectio  | 14       | 11,7 | 0,0042  | 0,0017       | 2,4             | 2,76955108  |
|         | GOTERM_BP_ | regulation of s | 7        | 5,8  | 0,0072  | 0,0017       | 4,1             | 2,76955108  |
|         | GOTERM_BP_ | lipid biosynth  | 9        | 7,5  | 0,0059  | 0,0017       | 3,3             | 2,76955108  |
|         | GOTERM_BP_ | lipid biosynth  | 9        | 7,5  | 0,007   | 0,0021       | 3,2             | 2,67778071  |
|         | GOTERM_MF_ | kinase activity | 11       | 9,2  | 0,0093  | 0,0034       | 2,6             | 2,46852108  |
|         | GOTERM_BP_ | regulation of s | 10       | 8,3  | 0,011   | 0,0037       | 2,7             | 2,43179828  |
|         | GOTERM_BP_ | regulation of s | 10       | 8,3  | 0,011   | 0,0038       | 2,7             | 2,4202164   |

|                             |    |      |        |        |     |            |
|-----------------------------|----|------|--------|--------|-----|------------|
| GOTERM_BP_ regulation of g  | 10 | 8,3  | 0,011  | 0,0038 | 2,7 | 2,4202164  |
| GOTERM_MF_ metal ion binc   | 30 | 25   | 0,007  | 0,0043 | 1,6 | 2,36653154 |
| GOTERM_MF_ transferase act  | 12 | 10   | 0,011  | 0,0045 | 2,4 | 2,34678749 |
| GOTERM_MF_ kinase activity  | 11 | 9,2  | 0,012  | 0,0048 | 2,5 | 2,31875876 |
| GOTERM_MF_ transferase act  | 12 | 10   | 0,013  | 0,0055 | 2,3 | 2,25963731 |
| GOTERM_BP_ protein phosph   | 18 | 15   | 0,011  | 0,0056 | 1,9 | 2,25181197 |
| GOTERM_MF_ protein kinase   | 9  | 7,5  | 0,016  | 0,0057 | 2,7 | 2,24412514 |
| GOTERM_BP_ synaptic trans   | 8  | 6,7  | 0,018  | 0,0057 | 2,9 | 2,24412514 |
| GOTERM_BP_ synaptic trans   | 8  | 6,7  | 0,018  | 0,0057 | 2,9 | 2,24412514 |
| GOTERM_MF_ phosphotrans     | 10 | 8,3  | 0,016  | 0,0059 | 2,5 | 2,22914799 |
| GOTERM_BP_ cellular lipid r | 11 | 9,2  | 0,015  | 0,0061 | 2,4 | 2,21467016 |
| GOTERM_MF_ cation binding   | 30 | 25   | 0,01   | 0,0064 | 1,5 | 2,19382003 |
| GOTERM_MF_ catalytic activ  | 43 | 35,8 | 0,0095 | 0,0067 | 1,4 | 2,1739252  |
| GOTERM_MF_ catalytic activ  | 43 | 35,8 | 0,0095 | 0,0067 | 1,4 | 2,1739252  |
| GOTERM_BP_ synaptic trans   | 8  | 6,7  | 0,021  | 0,0068 | 2,9 | 2,16749109 |
| GOTERM_BP_ cellular lipid r | 11 | 9,2  | 0,018  | 0,0074 | 2,3 | 2,13076828 |
| GOTERM_BP_ cellular lipid r | 11 | 9,2  | 0,018  | 0,0075 | 2,3 | 2,12493874 |
| GOTERM_MF_ ion binding      | 41 | 34,2 | 0,011  | 0,0077 | 1,4 | 2,11350927 |
| GOTERM_MF_ metal ion binc   | 30 | 25   | 0,012  | 0,0079 | 1,5 | 2,10237291 |
| GOTERM_MF_ phosphotrans     | 10 | 8,3  | 0,02   | 0,008  | 2,4 | 2,09691001 |
| GOTERM_BP_ axon developr    | 7  | 5,8  | 0,026  | 0,008  | 3,1 | 2,09691001 |
| GOTERM_BP_ response to nu   | 8  | 6,7  | 0,024  | 0,0081 | 2,8 | 2,09151498 |
| GOTERM_MF_ protein kinase   | 9  | 7,5  | 0,023  | 0,0087 | 2,5 | 2,06048075 |
| GOTERM_MF_ ion binding      | 41 | 34,2 | 0,013  | 0,0088 | 1,4 | 2,05551733 |
| GOTERM_MF_ cation binding   | 30 | 25   | 0,014  | 0,0091 | 1,5 | 2,04095861 |
| GOTERM_BP_ axon developr    | 7  | 5,8  | 0,029  | 0,0093 | 3   | 2,03151705 |
| GOTERM_BP_ response to nu   | 8  | 6,7  | 0,027  | 0,0096 | 2,7 | 2,01772877 |
| GOTERM_BP_ cell-cell signal | 11 | 9,2  | 0,023  | 0,01   | 2,2 | 2          |
| GOTERM_BP_ phosphorylati    | 19 | 15,8 | 0,018  | 0,01   | 1,7 | 2          |
| GOTERM_CC_ intracellular n  | 66 | 55   | 0,012  | 0,01   | 1,2 | 2          |
| GOTERM_CC_ intracellular n  | 66 | 55   | 0,013  | 0,011  | 1,2 | 1,95860731 |
| GOTERM_CC_ intracellular n  | 66 | 55   | 0,014  | 0,011  | 1,2 | 1,95860731 |
| GOTERM_BP_ cell-cell signal | 11 | 9,2  | 0,028  | 0,012  | 2,2 | 1,92081875 |
| GOTERM_MF_ protein serine   | 7  | 5,8  | 0,037  | 0,012  | 2,8 | 1,92081875 |

|                             |    |      |       |       |     |            |
|-----------------------------|----|------|-------|-------|-----|------------|
| GOTERM_BP_ cell-cell signal | 11 | 9,2  | 0,028 | 0,012 | 2,2 | 1,92081875 |
| GOTERM_BP_ response to ex   | 8  | 6,7  | 0,034 | 0,012 | 2,6 | 1,92081875 |
| GOTERM_BP_ response to ex   | 8  | 6,7  | 0,034 | 0,013 | 2,6 | 1,88605665 |
| GOTERM_CC_ endosome         | 9  | 7,5  | 0,033 | 0,013 | 2,4 | 1,88605665 |
| GOTERM_BP_ single-organis   | 14 | 11,7 | 0,027 | 0,013 | 1,9 | 1,88605665 |
| GOTERM_CC_ endosome         | 9  | 7,5  | 0,034 | 0,014 | 2,4 | 1,85387196 |
| GOTERM_BP_ phosphorylati    | 19 | 15,8 | 0,025 | 0,014 | 1,7 | 1,85387196 |
| GOTERM_BP_ single-organis   | 14 | 11,7 | 0,028 | 0,014 | 1,9 | 1,85387196 |
| GOTERM_CC_ cell periphery   | 35 | 29,2 | 0,021 | 0,014 | 1,4 | 1,85387196 |
| GOTERM_CC_ cell periphery   | 35 | 29,2 | 0,021 | 0,014 | 1,4 | 1,85387196 |
| GOTERM_CC_ membrane-bc      | 71 | 59,2 | 0,017 | 0,015 | 1,2 | 1,82390874 |
| GOTERM_CC_ endosome         | 9  | 7,5  | 0,038 | 0,016 | 2,3 | 1,79588002 |
| GOTERM_CC_ cell part        | 88 | 73,3 | 0,018 | 0,017 | 1,1 | 1,76955108 |
| GOTERM_CC_ plasma memb      | 34 | 28,3 | 0,024 | 0,017 | 1,4 | 1,76955108 |
| GOTERM_CC_ plasma memb      | 34 | 28,3 | 0,025 | 0,017 | 1,4 | 1,76955108 |
| GOTERM_BP_ establishment    | 20 | 16,7 | 0,031 | 0,018 | 1,6 | 1,74472749 |
| GOTERM_MF_ protein kinase   | 8  | 6,7  | 0,047 | 0,019 | 2,4 | 1,7212464  |
| GOTERM_BP_ regulation of c  | 6  | 5    | 0,057 | 0,019 | 2,9 | 1,7212464  |
| GOTERM_BP_ regulation of c  | 6  | 5    | 0,057 | 0,019 | 2,9 | 1,7212464  |
| GOTERM_CC_ plasma memb      | 34 | 28,3 | 0,027 | 0,019 | 1,4 | 1,7212464  |
| GOTERM_BP_ establishment    | 20 | 16,7 | 0,032 | 0,019 | 1,6 | 1,7212464  |
| GOTERM_MF_ transferase act  | 20 | 16,7 | 0,032 | 0,019 | 1,6 | 1,7212464  |
| GOTERM_CC_ cytoplasmic p    | 47 | 39,2 | 0,025 | 0,019 | 1,3 | 1,7212464  |
| GOTERM_CC_ synapse part     | 8  | 6,7  | 0,05  | 0,02  | 2,4 | 1,69897    |
| GOTERM_BP_ positive reguli  | 14 | 11,7 | 0,038 | 0,02  | 1,8 | 1,69897    |
| GOTERM_MF_ transferase act  | 20 | 16,7 | 0,034 | 0,02  | 1,6 | 1,69897    |
| GOTERM_BP_ regulation of c  | 6  | 5    | 0,062 | 0,021 | 2,8 | 1,67778071 |
| GOTERM_BP_ response to o)   | 13 | 10,8 | 0,041 | 0,021 | 1,9 | 1,67778071 |
| GOTERM_BP_ regulation of c  | 6  | 5    | 0,063 | 0,021 | 2,8 | 1,67778071 |
| GOTERM_CC_ endosome         | 9  | 7,5  | 0,05  | 0,021 | 2,2 | 1,67778071 |
| GOTERM_CC_ cytoplasmic p    | 47 | 39,2 | 0,028 | 0,021 | 1,3 | 1,67778071 |
| GOTERM_BP_ response to o)   | 13 | 10,8 | 0,042 | 0,021 | 1,9 | 1,67778071 |
| GOTERM_BP_ regulation of c  | 8  | 6,7  | 0,054 | 0,022 | 2,3 | 1,65757732 |
| GOTERM_BP_ regulation of c  | 8  | 6,7  | 0,055 | 0,022 | 2,3 | 1,65757732 |

|                                   |    |      |       |       |     |            |
|-----------------------------------|----|------|-------|-------|-----|------------|
| GOTERM_MF_enzyme binding          | 17 | 14,2 | 0,04  | 0,022 | 1,7 | 1,65757732 |
| GOTERM_CC_synapse                 | 10 | 8,3  | 0,051 | 0,023 | 2,1 | 1,63827216 |
| GOTERM_CC_synapse                 | 10 | 8,3  | 0,051 | 0,023 | 2,1 | 1,63827216 |
| GOTERM_BP_positive regulation of  | 14 | 11,7 | 0,046 | 0,025 | 1,8 | 1,60205999 |
| GOTERM_BP_lipid metabolism        | 12 | 10   | 0,05  | 0,025 | 1,9 | 1,60205999 |
| GOTERM_BP_intracellular transport | 14 | 11,7 | 0,047 | 0,025 | 1,8 | 1,60205999 |
| GOTERM_BP_positive regulation of  | 14 | 11,7 | 0,047 | 0,025 | 1,8 | 1,60205999 |
| GOTERM_BP_lipid metabolism        | 12 | 10   | 0,05  | 0,025 | 1,9 | 1,60205999 |
| GOTERM_CC_whole membrane          | 15 | 12,5 | 0,046 | 0,025 | 1,7 | 1,60205999 |
| GOTERM_BP_positive regulation of  | 14 | 11,7 | 0,048 | 0,026 | 1,8 | 1,58502665 |
| GOTERM_BP_regulation of cell      | 8  | 6,7  | 0,062 | 0,026 | 2,3 | 1,58502665 |
| GOTERM_BP_regulation of cell      | 13 | 10,8 | 0,05  | 0,026 | 1,8 | 1,58502665 |
| GOTERM_BP_signaling               | 43 | 35,8 | 0,035 | 0,026 | 1,3 | 1,58502665 |
| GOTERM_BP_signaling               | 43 | 35,8 | 0,035 | 0,026 | 1,3 | 1,58502665 |
| GOTERM_BP_regulation of cell      | 8  | 6,7  | 0,064 | 0,027 | 2,2 | 1,56863624 |
| GOTERM_MF_protein kinase          | 8  | 6,7  | 0,063 | 0,027 | 2,2 | 1,56863624 |
| GOTERM_CC_cytoplasmic part        | 47 | 39,2 | 0,034 | 0,027 | 1,2 | 1,56863624 |
| GOTERM_MF_purine ribonucleoside   | 16 | 13,3 | 0,047 | 0,027 | 1,7 | 1,56863624 |
| GOTERM_CC_Golgi apparatus         | 6  | 5    | 0,076 | 0,027 | 2,6 | 1,56863624 |
| GOTERM_MF_ribonucleoside          | 16 | 13,3 | 0,048 | 0,027 | 1,7 | 1,56863624 |
| GOTERM_MF_purine nucleoside       | 16 | 13,3 | 0,048 | 0,027 | 1,7 | 1,56863624 |
| GOTERM_MF_identical protein       | 13 | 10,8 | 0,052 | 0,027 | 1,8 | 1,56863624 |
| GOTERM_MF_enzyme binding          | 17 | 14,2 | 0,048 | 0,028 | 1,6 | 1,55284197 |
| GOTERM_CC_Golgi apparatus         | 6  | 5    | 0,078 | 0,028 | 2,6 | 1,55284197 |
| GOTERM_MF_nucleoside binding      | 16 | 13,3 | 0,049 | 0,028 | 1,7 | 1,55284197 |
| GOTERM_BP_autophagy               | 6  | 5    | 0,079 | 0,028 | 2,6 | 1,55284197 |
| GOTERM_MF_protein binding         | 54 | 45   | 0,035 | 0,028 | 1,2 | 1,55284197 |
| GOTERM_BP_regulation of cell      | 9  | 7,5  | 0,064 | 0,029 | 2,1 | 1,537602   |
| GOTERM_BP_regulation of cell      | 9  | 7,5  | 0,064 | 0,029 | 2,1 | 1,537602   |
| GOTERM_BP_blood circulation       | 6  | 5    | 0,081 | 0,029 | 2,6 | 1,537602   |
| GOTERM_CC_synapse part            | 8  | 6,7  | 0,07  | 0,03  | 2,2 | 1,52287875 |
| GOTERM_CC_synapse part            | 8  | 6,7  | 0,07  | 0,03  | 2,2 | 1,52287875 |
| GOTERM_BP_circulatory system      | 6  | 5    | 0,083 | 0,03  | 2,6 | 1,52287875 |
| GOTERM_CC_Golgi apparatus         | 6  | 5    | 0,084 | 0,031 | 2,5 | 1,50863831 |

|                            |    |      |       |       |     |            |
|----------------------------|----|------|-------|-------|-----|------------|
| GOTERM_BP_ regulation of r | 26 | 21,7 | 0,046 | 0,031 | 1,4 | 1,50863831 |
| GOTERM_BP_ regulation of p | 15 | 12,5 | 0,055 | 0,031 | 1,7 | 1,50863831 |
| GOTERM_MF_ nucleotide bir  | 19 | 15,8 | 0,051 | 0,031 | 1,6 | 1,50863831 |
| GOTERM_MF_ nucleoside ph   | 19 | 15,8 | 0,051 | 0,031 | 1,6 | 1,50863831 |
| GOTERM_BP_ intracellular t | 14 | 11,7 | 0,057 | 0,031 | 1,7 | 1,50863831 |
| GOTERM_MF_ purine ribonu   | 16 | 13,3 | 0,055 | 0,031 | 1,6 | 1,50863831 |
| GOTERM_BP_ cell communi    | 44 | 36,7 | 0,041 | 0,031 | 1,3 | 1,50863831 |
| GOTERM_BP_ regulation of r | 26 | 21,7 | 0,048 | 0,032 | 1,4 | 1,49485002 |
| GOTERM_BP_ autophagy       | 6  | 5    | 0,087 | 0,032 | 2,5 | 1,49485002 |
| GOTERM_MF_ identical prot  | 13 | 10,8 | 0,061 | 0,033 | 1,7 | 1,48148606 |
| GOTERM_BP_ regulation of r | 26 | 21,7 | 0,049 | 0,033 | 1,4 | 1,48148606 |
| GOTERM_MF_ purine nucleo   | 16 | 13,3 | 0,057 | 0,033 | 1,6 | 1,48148606 |
| GOTERM_BP_ blood circulat  | 6  | 5    | 0,089 | 0,033 | 2,5 | 1,48148606 |
| GOTERM_BP_ cell communi    | 44 | 36,7 | 0,043 | 0,033 | 1,3 | 1,48148606 |
| GOTERM_MF_ protein bindir  | 54 | 45   | 0,041 | 0,033 | 1,2 | 1,48148606 |
| GOTERM_MF_ ribonucleotid   | 16 | 13,3 | 0,058 | 0,034 | 1,6 | 1,46852108 |
| GOTERM_BP_ circulatory sy: | 6  | 5    | 0,091 | 0,034 | 2,5 | 1,46852108 |
| GOTERM_BP_ regulation of t | 9  | 7,5  | 0,074 | 0,034 | 2   | 1,46852108 |
| GOTERM_MF_ nucleoside bir  | 16 | 13,3 | 0,059 | 0,034 | 1,6 | 1,46852108 |
| GOTERM_BP_ regulation of f | 8  | 6,7  | 0,079 | 0,035 | 2,1 | 1,45593196 |
| GOTERM_BP_ regulation of c | 8  | 6,7  | 0,084 | 0,037 | 2,1 | 1,43179828 |
| GOTERM_BP_ regulation of c | 8  | 6,7  | 0,084 | 0,037 | 2,1 | 1,43179828 |
| GOTERM_CC_ Golgi apparat   | 6  | 5    | 0,099 | 0,038 | 2,4 | 1,4202164  |
| GOTERM_BP_ positive regul: | 14 | 11,7 | 0,068 | 0,038 | 1,7 | 1,4202164  |
| GOTERM_MF_ ribonucleosid   | 16 | 13,3 | 0,065 | 0,038 | 1,6 | 1,4202164  |
| GOTERM_BP_ positive regul: | 14 | 11,7 | 0,068 | 0,038 | 1,7 | 1,4202164  |
| GOTERM_MF_ purine nucleo   | 16 | 13,3 | 0,065 | 0,039 | 1,6 | 1,40893539 |
| GOTERM_BP_ regulation of p | 15 | 12,5 | 0,068 | 0,039 | 1,6 | 1,40893539 |
| GOTERM_MF_ anion binding   | 21 | 17,5 | 0,061 | 0,039 | 1,5 | 1,40893539 |
| GOTERM_MF_ nucleotide bir  | 19 | 15,8 | 0,063 | 0,039 | 1,5 | 1,40893539 |
| GOTERM_MF_ nucleoside ph   | 19 | 15,8 | 0,063 | 0,039 | 1,5 | 1,40893539 |
| GOTERM_BP_ single organis  | 42 | 35   | 0,051 | 0,039 | 1,3 | 1,40893539 |
| GOTERM_BP_ regulation of f | 8  | 6,7  | 0,089 | 0,04  | 2,1 | 1,39794001 |
| GOTERM_BP_ regulation of s | 19 | 15,8 | 0,065 | 0,04  | 1,5 | 1,39794001 |

|                            |    |      |       |       |     |            |
|----------------------------|----|------|-------|-------|-----|------------|
| GOTERM_BP_ regulation of s | 19 | 15,8 | 0,065 | 0,041 | 1,5 | 1,38721614 |
| GOTERM_BP_ negative regul  | 11 | 9,2  | 0,079 | 0,041 | 1,8 | 1,38721614 |
| GOTERM_BP_ negative regul  | 11 | 9,2  | 0,079 | 0,041 | 1,8 | 1,38721614 |
| GOTERM_BP_ single organis  | 42 | 35   | 0,053 | 0,041 | 1,3 | 1,38721614 |
| GOTERM_BP_ negative regul  | 7  | 5,8  | 0,097 | 0,041 | 2,2 | 1,38721614 |
| GOTERM_MF_ ribonucleotid   | 16 | 13,3 | 0,069 | 0,041 | 1,6 | 1,38721614 |
| GOTERM_CC_ Golgi apparat   | 12 | 10   | 0,077 | 0,042 | 1,7 | 1,37675071 |
| GOTERM_BP_ phosphate-co    | 22 | 18,3 | 0,064 | 0,042 | 1,4 | 1,37675071 |
| GOTERM_BP_ regulation of c | 8  | 6,7  | 0,093 | 0,042 | 2   | 1,37675071 |
| GOTERM_BP_ regulation of c | 8  | 6,7  | 0,094 | 0,043 | 2   | 1,36653154 |
| GOTERM_BP_ regulation of p | 13 | 10,8 | 0,078 | 0,043 | 1,7 | 1,36653154 |
| GOTERM_CC_ Golgi apparat   | 12 | 10   | 0,081 | 0,044 | 1,7 | 1,35654732 |
| GOTERM_MF_ purine ribonu   | 16 | 13,3 | 0,074 | 0,044 | 1,6 | 1,35654732 |
| GOTERM_BP_ localization    | 38 | 31,7 | 0,06  | 0,045 | 1,3 | 1,34678749 |
| GOTERM_BP_ localization    | 38 | 31,7 | 0,06  | 0,045 | 1,3 | 1,34678749 |
| GOTERM_BP_ protein metak   | 35 | 29,2 | 0,061 | 0,045 | 1,3 | 1,34678749 |
| GOTERM_MF_ carbohydrate    | 18 | 15   | 0,073 | 0,045 | 1,5 | 1,34678749 |
| GOTERM_MF_ purine ribonu   | 16 | 13,3 | 0,075 | 0,045 | 1,6 | 1,34678749 |
| GOTERM_MF_ nucleotide bir  | 19 | 15,8 | 0,072 | 0,046 | 1,5 | 1,33724217 |
| GOTERM_BP_ neuron differe  | 12 | 10   | 0,085 | 0,046 | 1,7 | 1,33724217 |
| GOTERM_MF_ purine nucleo   | 16 | 13,3 | 0,077 | 0,046 | 1,6 | 1,33724217 |
| GOTERM_BP_ positive reguli | 14 | 11,7 | 0,081 | 0,047 | 1,6 | 1,32790214 |
| GOTERM_BP_ regulation of r | 9  | 7,5  | 0,096 | 0,047 | 1,9 | 1,32790214 |
| GOTERM_BP_ regulation of r | 9  | 7,5  | 0,096 | 0,047 | 1,9 | 1,32790214 |
| GOTERM_CC_ whole membr     | 15 | 12,5 | 0,08  | 0,047 | 1,6 | 1,32790214 |
| GOTERM_BP_ positive reguli | 14 | 11,7 | 0,082 | 0,047 | 1,6 | 1,32790214 |
| GOTERM_BP_ growth          | 10 | 8,3  | 0,093 | 0,047 | 1,8 | 1,32790214 |
| GOTERM_BP_ growth          | 10 | 8,3  | 0,093 | 0,047 | 1,8 | 1,32790214 |
| GOTERM_MF_ ribonucleotid   | 16 | 13,3 | 0,078 | 0,047 | 1,6 | 1,32790214 |
| GOTERM_BP_ establishment   | 15 | 12,5 | 0,081 | 0,048 | 1,6 | 1,31875876 |
| GOTERM_CC_ cell periphery  | 35 | 29,2 | 0,065 | 0,048 | 1,3 | 1,31875876 |
| GOTERM_BP_ negative regul  | 11 | 9,2  | 0,091 | 0,048 | 1,8 | 1,31875876 |
| GOTERM_MF_ carbohydrate    | 18 | 15   | 0,077 | 0,048 | 1,5 | 1,31875876 |
| GOTERM_MF_ purine ribonu   | 15 | 12,5 | 0,082 | 0,048 | 1,6 | 1,31875876 |

|                             |    |      |       |       |     |            |
|-----------------------------|----|------|-------|-------|-----|------------|
| GOTERM_BP_ negative regul   | 11 | 9,2  | 0,092 | 0,049 | 1,8 | 1,30980392 |
| GOTERM_CC_ plasma memb      | 9  | 7,5  | 0,1   | 0,049 | 1,9 | 1,30980392 |
| GOTERM_MF_ anion binding    | 21 | 17,5 | 0,075 | 0,049 | 1,4 | 1,30980392 |
| GOTERM_CC_ Golgi apparat    | 12 | 10   | 0,09  | 0,05  | 1,7 | 1,30103    |
| GOTERM_BP_ regulation of p  | 14 | 11,7 | 0,086 | 0,05  | 1,6 | 1,30103    |
| GOTERM_BP_ neuron develc    | 10 | 8,3  | 0,098 | 0,051 | 1,8 | 1,29242982 |
| GOTERM_BP_ neuron develc    | 10 | 8,3  | 0,098 | 0,051 | 1,8 | 1,29242982 |
| GOTERM_BP_ protein transp   | 14 | 11,7 | 0,088 | 0,051 | 1,6 | 1,29242982 |
| GOTERM_BP_ protein transp   | 14 | 11,7 | 0,088 | 0,051 | 1,6 | 1,29242982 |
| GOTERM_BP_ regulation of s  | 19 | 15,8 | 0,08  | 0,051 | 1,5 | 1,29242982 |
| GOTERM_BP_ regulation of p  | 14 | 11,7 | 0,088 | 0,051 | 1,6 | 1,29242982 |
| GOTERM_BP_ regulation of p  | 14 | 11,7 | 0,088 | 0,052 | 1,6 | 1,28399666 |
| GOTERM_MF_ adenyli ribonu   | 13 | 10,8 | 0,092 | 0,052 | 1,6 | 1,28399666 |
| GOTERM_BP_ regulation of s  | 19 | 15,8 | 0,082 | 0,052 | 1,5 | 1,28399666 |
| GOTERM_MF_ purine ribonu    | 16 | 13,3 | 0,086 | 0,053 | 1,5 | 1,27572413 |
| GOTERM_CC_ plasma memb      | 34 | 28,3 | 0,073 | 0,054 | 1,3 | 1,26760624 |
| GOTERM_MF_ adenyli nucleo   | 13 | 10,8 | 0,095 | 0,054 | 1,6 | 1,26760624 |
| GOTERM_MF_ purine nucleo    | 16 | 13,3 | 0,089 | 0,055 | 1,5 | 1,25963731 |
| GOTERM_BP_ neuron differe   | 12 | 10   | 0,099 | 0,056 | 1,7 | 1,25181197 |
| GOTERM_BP_ phosphate-co     | 22 | 18,3 | 0,084 | 0,056 | 1,4 | 1,25181197 |
| GOTERM_MF_ ribonucleotid    | 16 | 13,3 | 0,091 | 0,056 | 1,5 | 1,25181197 |
| GOTERM_BP_ regulation of t  | 24 | 20   | 0,083 | 0,057 | 1,4 | 1,24412514 |
| GOTERM_BP_ regulation of c  | 18 | 15   | 0,09  | 0,057 | 1,5 | 1,24412514 |
| GOTERM_BP_ regulation of c  | 18 | 15   | 0,09  | 0,057 | 1,5 | 1,24412514 |
| GOTERM_CC_ intracellular    | 77 | 64,2 | 0,064 | 0,058 | 1,1 | 1,23657201 |
| GOTERM_BP_ cellular localiz | 21 | 17,5 | 0,087 | 0,058 | 1,4 | 1,23657201 |
| GOTERM_BP_ establishment    | 15 | 12,5 | 0,096 | 0,058 | 1,5 | 1,23657201 |
| GOTERM_BP_ regulation of t  | 24 | 20   | 0,085 | 0,059 | 1,4 | 1,22914799 |
| GOTERM_CC_ intracellular    | 77 | 64,2 | 0,066 | 0,059 | 1,1 | 1,22914799 |
| GOTERM_BP_ establishment    | 15 | 12,5 | 0,097 | 0,059 | 1,5 | 1,22914799 |
| GOTERM_BP_ cellular localiz | 21 | 17,5 | 0,089 | 0,059 | 1,4 | 1,22914799 |
| GOTERM_BP_ intracellular s  | 18 | 15   | 0,094 | 0,061 | 1,5 | 1,21467016 |
| GOTERM_BP_ intracellular s  | 18 | 15   | 0,095 | 0,061 | 1,5 | 1,21467016 |
| GOTERM_BP_ protein modif    | 24 | 20   | 0,09  | 0,063 | 1,4 | 1,20065945 |

|                             |    |      |       |       |     |            |
|-----------------------------|----|------|-------|-------|-----|------------|
| GOTERM_BP_! cellular protei | 24 | 20   | 0,09  | 0,063 | 1,4 | 1,20065945 |
| GOTERM_BP_! protein modif   | 24 | 20   | 0,091 | 0,063 | 1,4 | 1,20065945 |
| GOTERM_CC_! cytoplasm       | 62 | 51,7 | 0,074 | 0,063 | 1,1 | 1,20065945 |
| GOTERM_BP_! phosphorus r    | 22 | 18,3 | 0,093 | 0,063 | 1,4 | 1,20065945 |
| GOTERM_BP_! phosphorus r    | 22 | 18,3 | 0,095 | 0,065 | 1,4 | 1,18708664 |
| GOTERM_BP_! protein metak   | 35 | 29,2 | 0,087 | 0,066 | 1,3 | 1,18045606 |
| GOTERM_BP_! protein metak   | 35 | 29,2 | 0,089 | 0,068 | 1,3 | 1,16749109 |
| GOTERM_CC_! cytoplasm       | 62 | 51,7 | 0,084 | 0,072 | 1,1 | 1,1426675  |
| GOTERM_BP_! cellular protei | 30 | 25   | 0,099 | 0,073 | 1,3 | 1,13667714 |
| GOTERM_BP_! cellular protei | 30 | 25   | 0,1   | 0,074 | 1,3 | 1,13076828 |
| GOTERM_CC_! intracellular c | 67 | 55,8 | 0,092 | 0,081 | 1,1 | 1,09151498 |
| GOTERM_CC_! intracellular c | 67 | 55,8 | 0,094 | 0,082 | 1,1 | 1,08618615 |

11 from your list are not in the output,
